# Supplementary material for: Changing the amyloid nucleation process using small molecules and substrates: a way to build two-dimensional materials
Source: Royal Society of Chemistry journal article supplement (doi:10.1039/d4nr04624b), 2025-01-01
Supplement: d4nr04624b1.pdf [file d4nr04624b1.pdf]

Supporting information for:

**Changing amyloid nucleation process by small molecule and substrate: a way to build two-dimensional materials**

*Chao Chen,<sup>a</sup> Chenyang Wu,<sup>a</sup> Tiantian Yang,<sup>a</sup> Wenhui Zhao,<sup>a</sup> Jiangtao Lei<sup>\*b</sup> and Dongdong Lin<sup>\*a</sup>*

<sup>a</sup> School of Physical Science and Technology, Ningbo University, 818 Fenghua Road, Ningbo 315211, P. R. China.

<sup>b</sup> School of Physics and Materials Science, Nanchang University, Xuefu Avenue 999, Nanchang City 330031, China

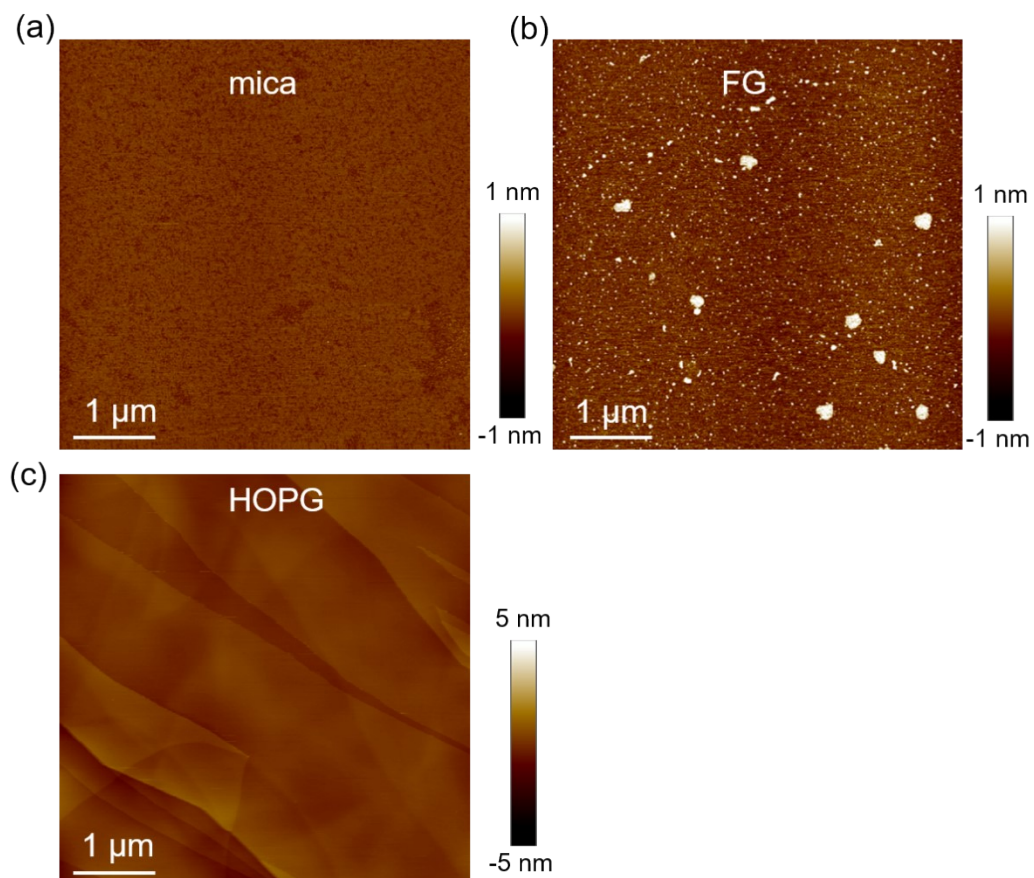

**Fig. S1.** Morphologies of FG small molecules deposited on mica surface. **a.** AFM image of fresh mica surface. **b.** AFM image of FG molecules on mica. **c.** AFM image of fresh HOPG surface.

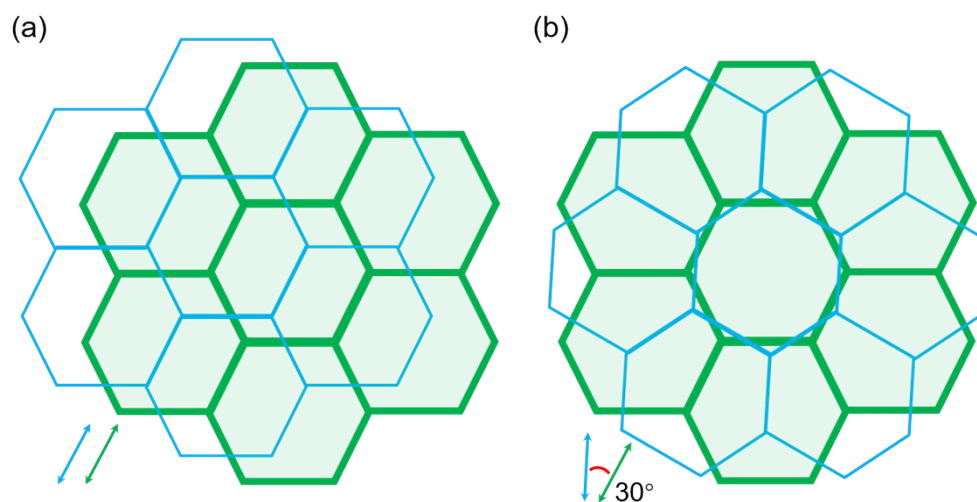

**Fig. S2.** Packing mode between filaments and HOPG. **a.** The filaments (blue) were in parallel with HOPG (green). **b.** The filaments (blue) rotated 30° with HOPG (green).

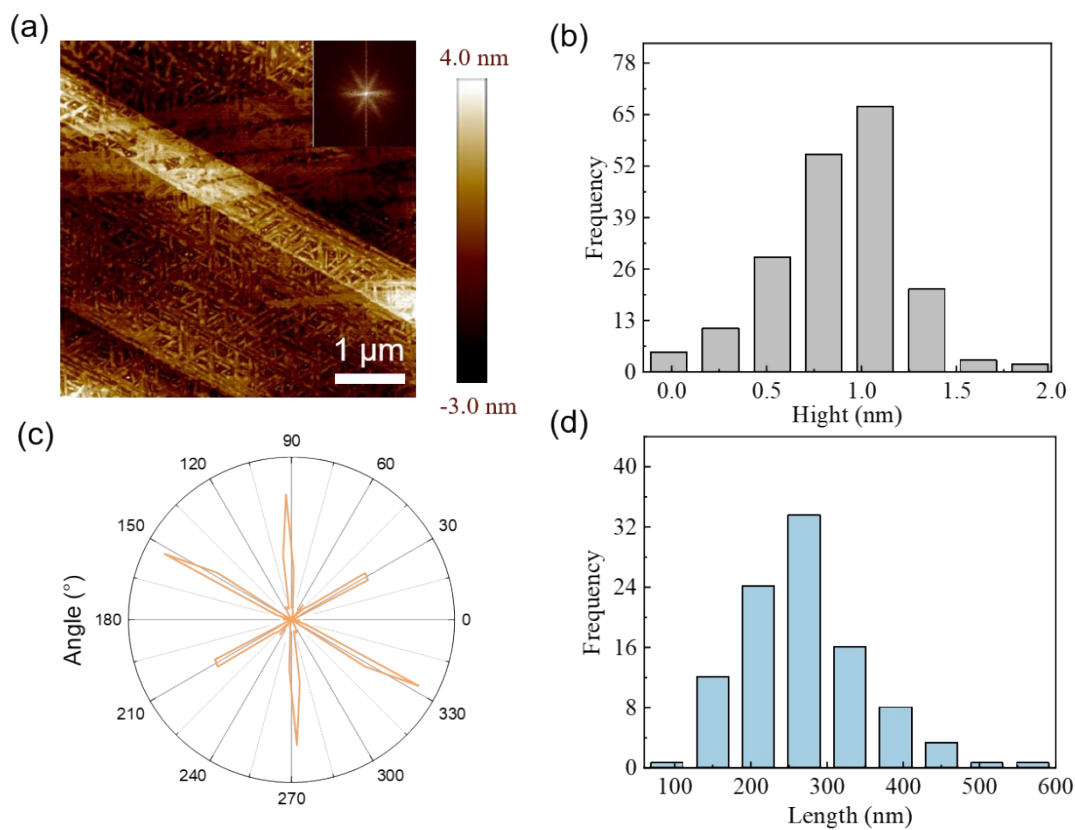

**Fig. S3.** Co-assembly of peptides and FG on HOPG surface. The incubation time was 48 min. **a.** The AFM image of ordered filaments, with its Fourier transform image. **b.** The height distribution of the filaments from **a.** **c.** The distribution of filament orientation in **a.** **d.** The length distribution of filaments from **a.**

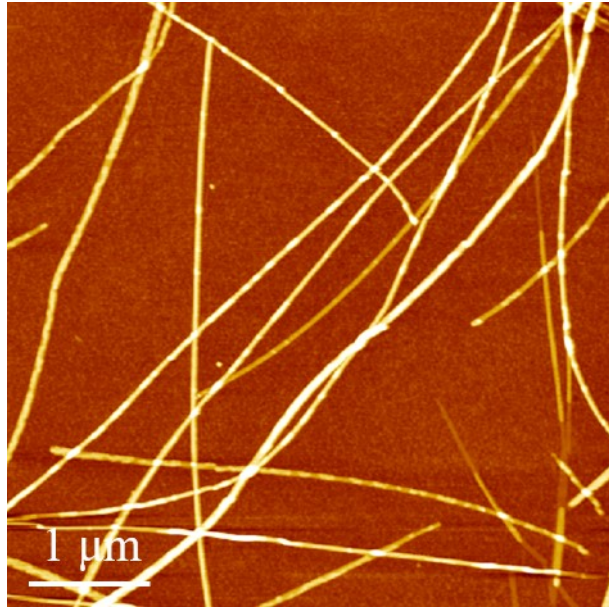

**Fig. S4.** AFM image of  $A\beta_{16-22}$  mature fibrils. The concentration of  $A\beta_{16-22}$  were 40  $\mu\text{M}$ .

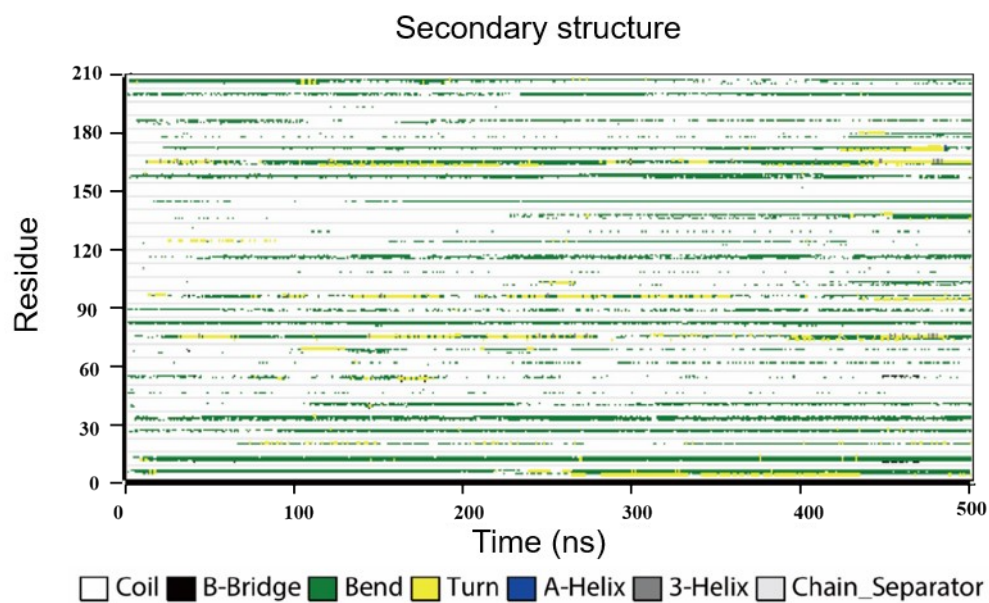

**Fig. S5.** Secondary structure evolution map in 500 ns. Thirty Aβ<sub>16-22</sub> peptide chains were placed on a graphene substrate for simulation.

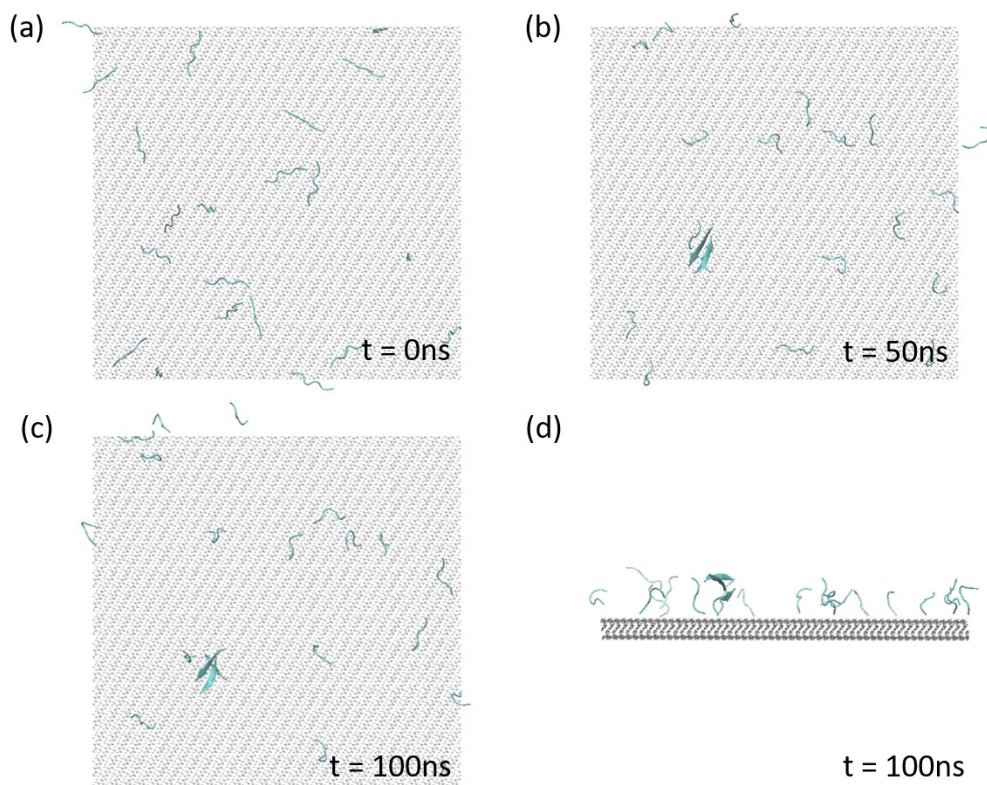

**Fig. S6.** MD simulation of Aβ<sub>16-22</sub> peptides absorbed on Mica. **a-c.** The snapshots of growth state (0 ns, 50 ns, 100 ns, respectively) on Mica surface. 30 chains were used in the system. **d.** Typical snapshot in 100 ns was exhibited with different postures of Aβ<sub>16-</sub>

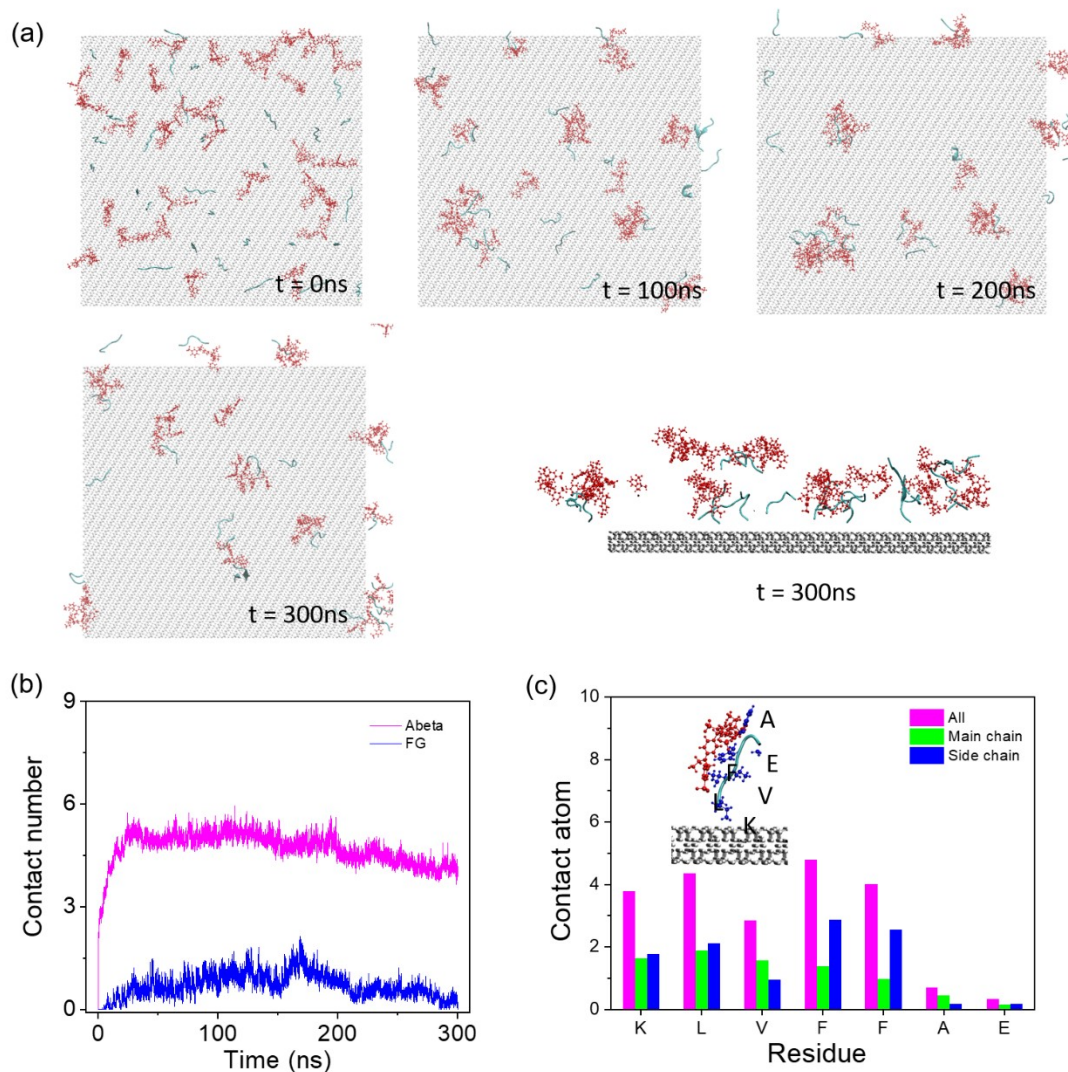

**Fig. S7.** MD simulation of  $A\beta_{16-22}$  peptides/FG molecules nucleation on Mica surface. **a.** The snapshots of growth state (0 ns, 100 ns, 200 ns and 300 ns, respectively) on Mica surface. Together with a side view of state in 300 ns. **b.** Time evolution of the contact number between  $A\beta_{16-22}$  peptides/FG molecules and Mica surface. **c.** Analysis of the contact number between the substrate surface and each residue of  $A\beta_{16-22}$ . The inset show the interaction between one peptide and two FG molecules on Mica surface.
